# Supplementary material
Source: Springer Nature journal article supplement (https://www.springermedizin.de/resource/supplementary/12865_2007_160_MOESM9_ESM.pdf/9428636)

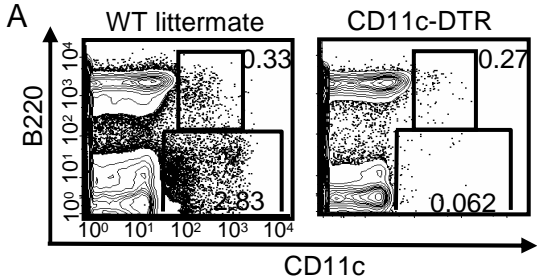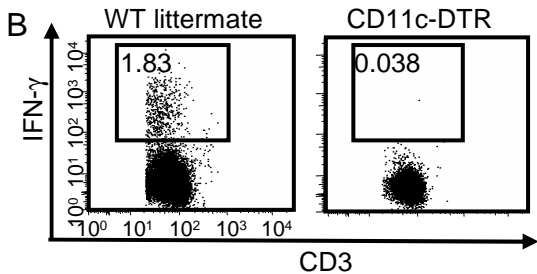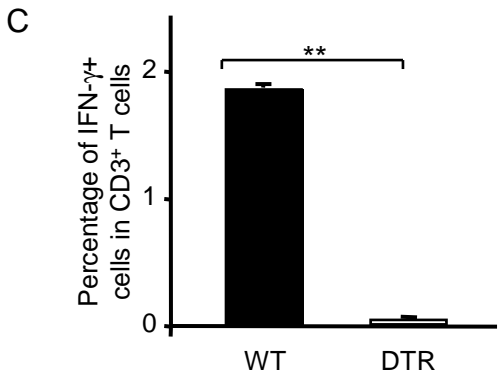

Supplement: MOESM9 [file 9428636]
